# Supplementary material
Source: publisher figshare collection journal article supplement (https://rs.figshare.com/ndownloader/files/29643309)
Supplement: Supplementary file 1 [file 29643309]

# The interplay of wind and uplift facilitates over-water flight in facultative soaring birds

Elham Nourani, Gil Bohrer, Paolo Becciu, Richard O. Bierregaard, Olivier Duriez, Jordi Figuerola, Laura Gango, Sinos Giokas, Hiroyoshi Higuchi, Christina Kassara, Olga Kulikova, Nicolas Lecomte, Flavio Monti, Ivan Pokrovsky, Andrea Sforzi, Jean-François Therrien, Nikos Tsiopelas, Wouter M.G. Vansteelant, Duarte S. Viana, Noriyuki M. Yamaguchi, Martin Wikelski, and Kamran Safi

Proceedings of the Royal Society B: Biological Sciences

DOI: 10.1098/rspb.2021.1603

## Abstract

Flying over the open sea is energetically costly for terrestrial birds. Despite this, over-water journeys of many birds, sometimes hundreds of kilometers long, are uncovered by bio-logging technology. To understand how these birds afford their flights over the open sea, we investigated the role of atmospheric conditions, specifically wind and uplift, in subsidizing over-water flight at the global scale. We first established that  $\Delta T$ , the temperature difference between sea surface and air, is a meaningful proxy for uplift over water. Using this proxy, we showed that the spatio-temporal patterns of sea-crossing in terrestrial migratory birds is associated with favorable uplift conditions. We then analyzed route selection over the open sea for five facultative soaring species, representing all major migratory flyways. The birds maximized wind support when selecting their sea-crossing routes and selected higher uplift when suitable wind support was available. They also preferred routes with low long-term uncertainty in wind conditions. Our findings suggest that, in addition to wind, uplift may play a key role in the energy seascape for bird migration that in turn determines strategies and associated costs for birds crossing ecological barriers such as the open sea.

Supplementary material

Supplementary Figure 1

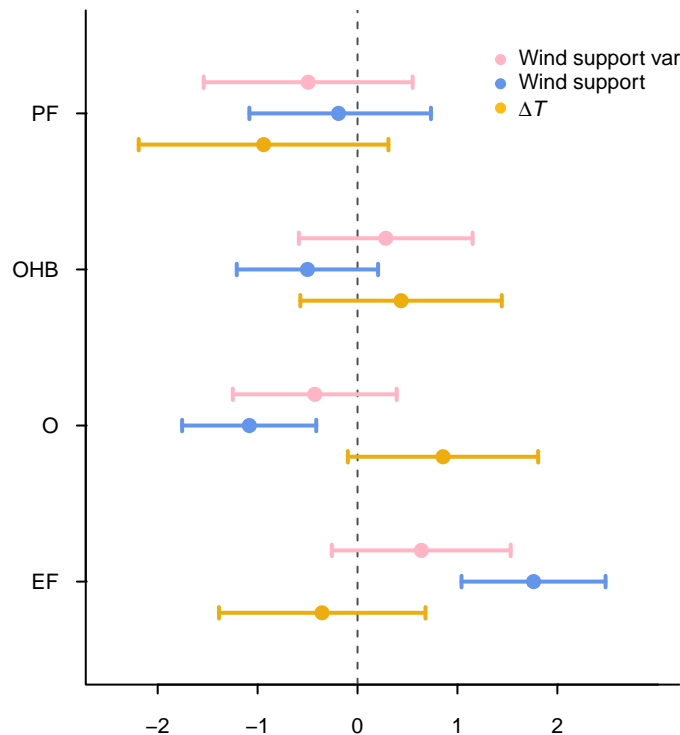

Figure S1: Species-specific variation in route selection. Posterior means and 95 % credible intervals are shown for the species-level random effects of the best INLA model.

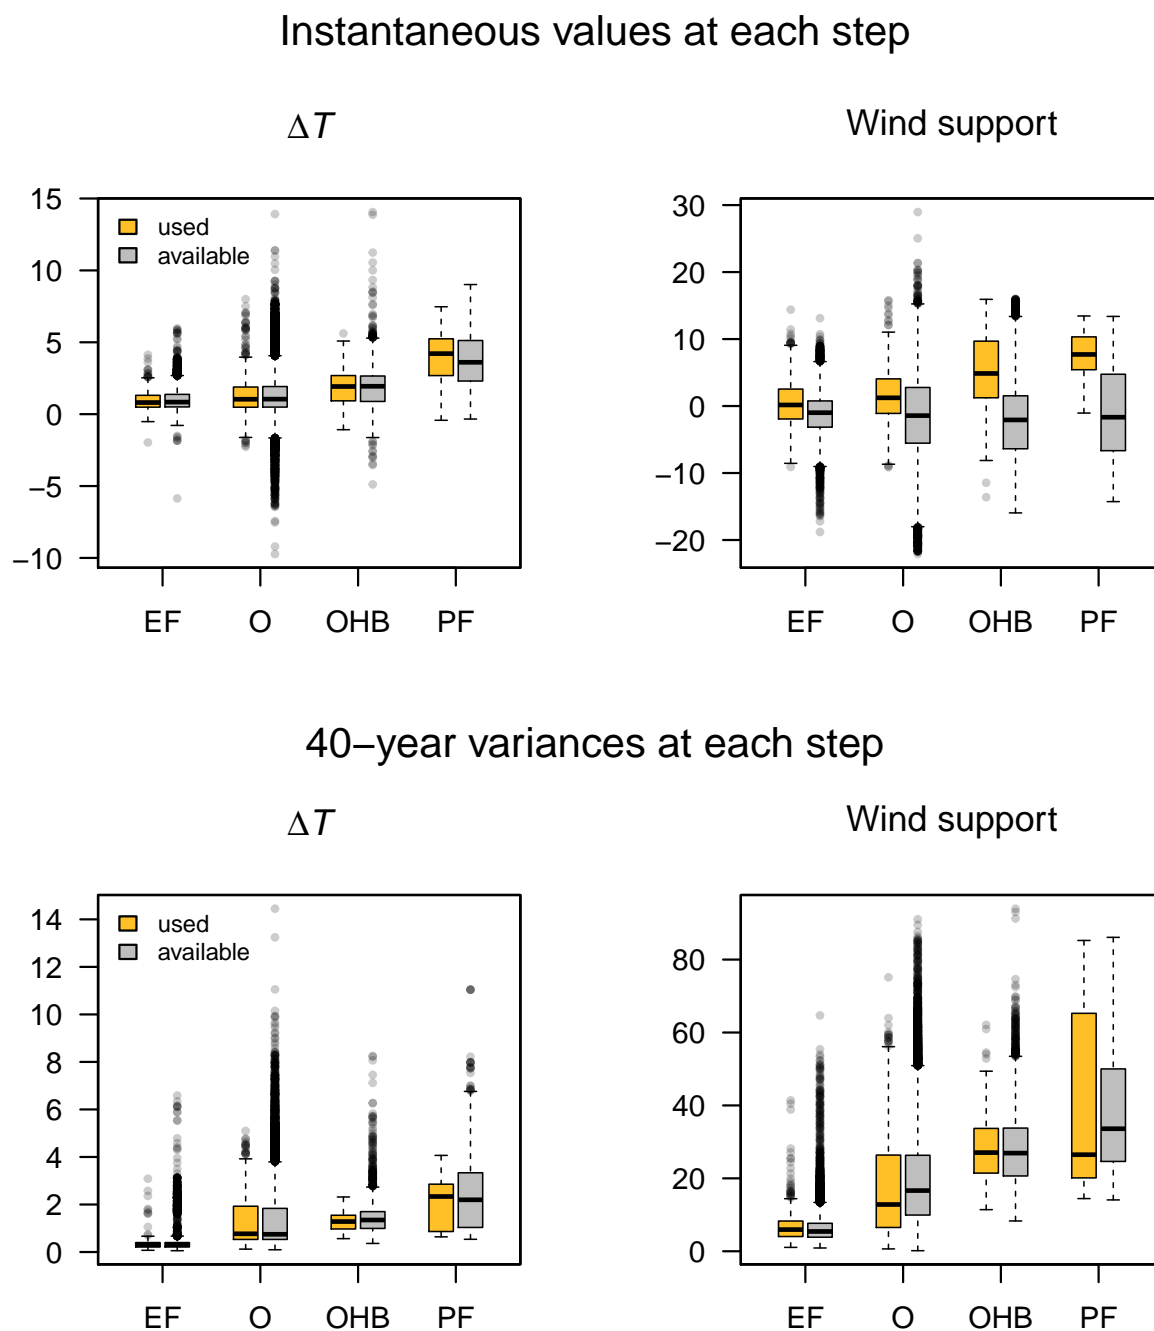

Figure S2: Distribution of values over the used and available steps. These were used for building the step-selection functions. The top row shows the instantaneous values and the bottom row the long-term variances. In the top row, it can be seen that wind support has more variability than  $\Delta T$  and higher values of wind support are selected by the birds.

# Supplementary Figure 3

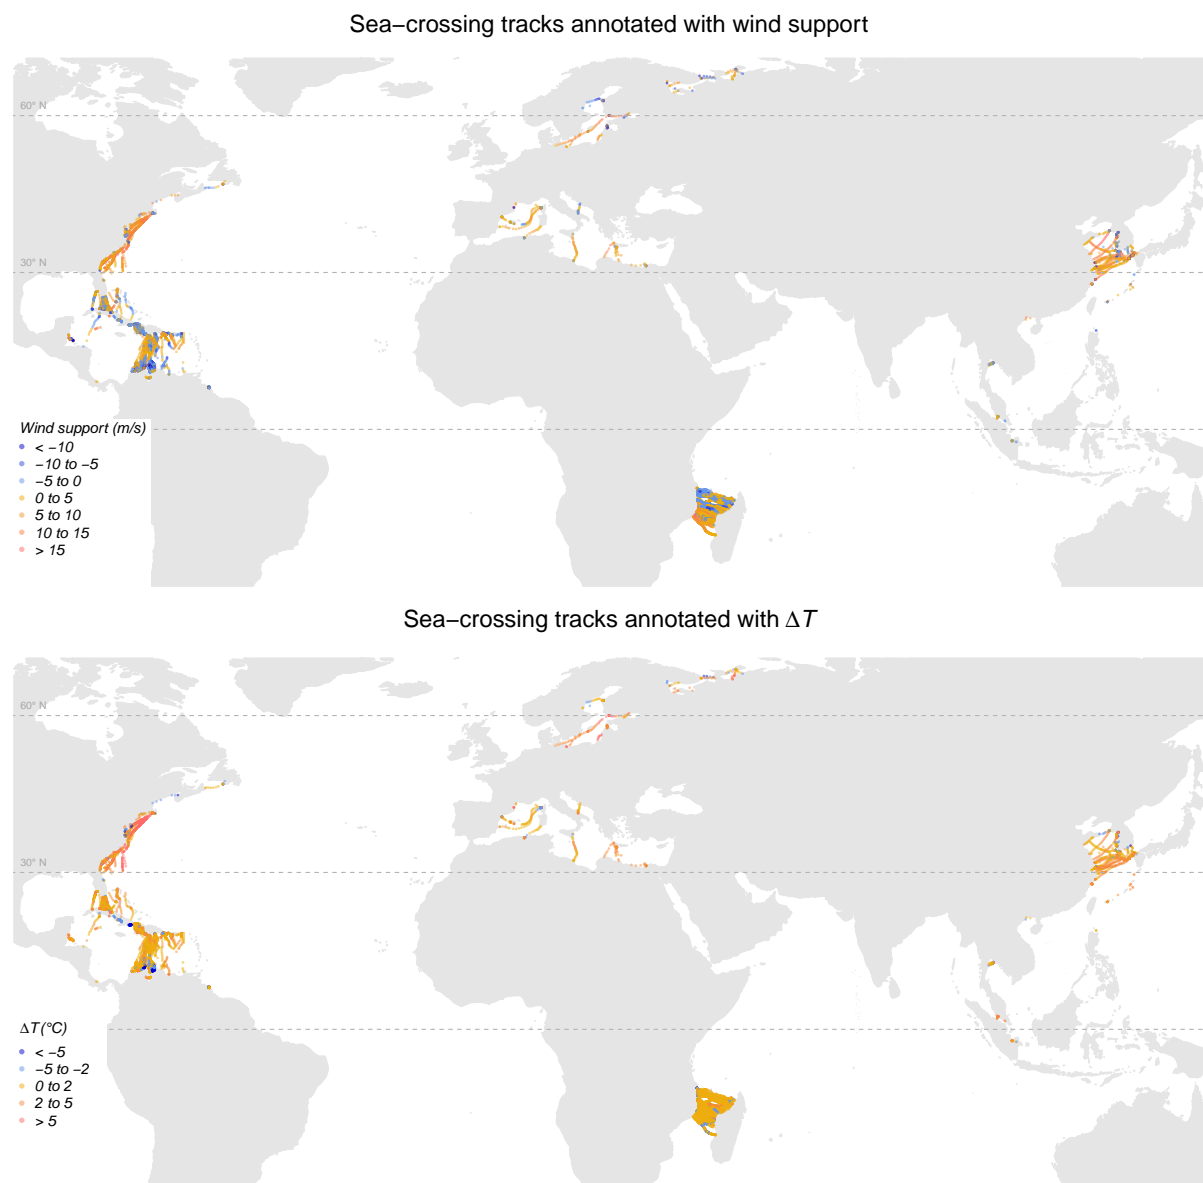

Figure S3: Bio-logging data for sea-crossing tracks annotated with wind support and  $\Delta T$ . Data is pooled for sea-crossing segments during autumn migration of the Oriental honey buzzard *Pernis ptilorhynchus* and the grey-faced buzzard *Butastur indicus* in the East Asian flyways, the osprey *Pandion haliaetus* and the peregrine falcon *Falco peregrinus*, in both the African-Eurasian and the American flyways, and the Eleonora's falcon *Falco eleonora* in the African-Eurasian flyway. For samples of complete tracks, see Fig. ??.

## Supplementary Figure 4

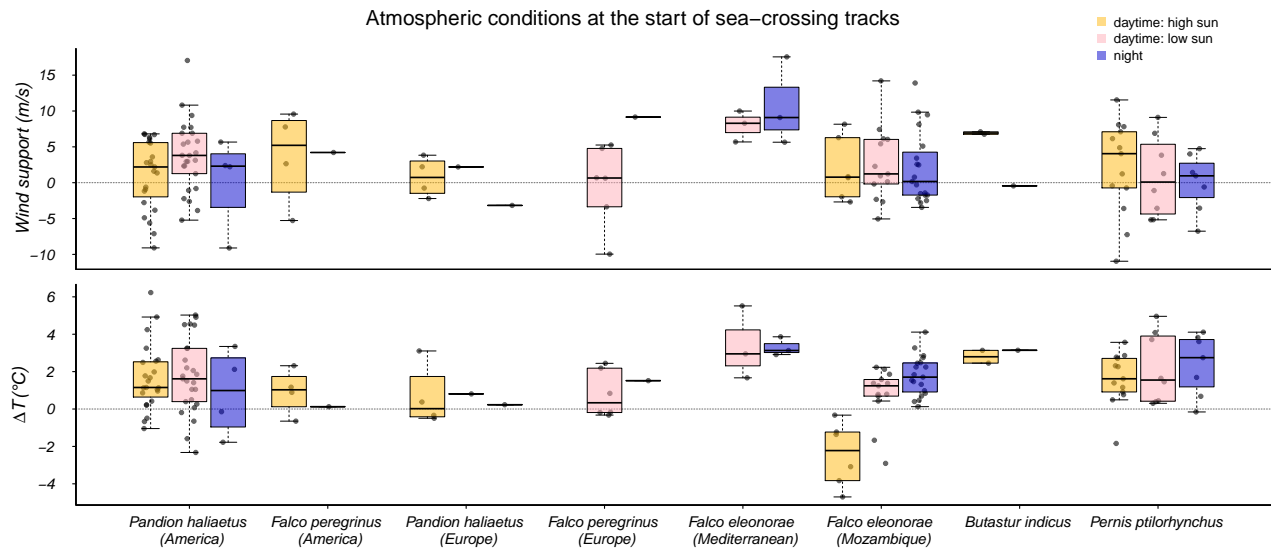

Figure S4: Wind support and  $\Delta T$  values at the start of each sea-crossing track, grouped by time of day. Most species initiated sea-crossing with positive  $\Delta T$  and tailwind. An overview of wind support and  $\Delta T$  along the sea-crossing tracks is presented in Fig. S3.

# Supplementary Table 1

Table S1: Summary of bio-logging data used in the step-selection function analysis. The number of individuals and migratory tracks correspond to the data that were retained after filtering the raw data set (see methods). The corresponding Movebank study names are shown in the footnotes.

| Species                       | Tagging_location | Device | Years     | Individuals | Tracks |
|-------------------------------|------------------|--------|-----------|-------------|--------|
| Eleonora's falcon             | Greece           | GPS    | 2015      | 3           | 3      |
| Eleonora's falcon             | Spain            | GPS    | 2012-2018 | 10          | 19     |
| Oriental honey buzzard        | Japan            | GPS    | 2017-2019 | 8           | 17     |
| Osprey <sup>a</sup>           | South Europe     | GPS    | 2013-2019 | 4           | 4      |
| Osprey <sup>b</sup>           | North America    | GPS    | 2010-2019 | 10          | 15     |
| Peregrine falcon <sup>c</sup> | North Europe     | GPS    | 2018-2020 | 4           | 5      |
| Peregrine falcon <sup>c</sup> | North America    | GPS    | 2016      | 3           | 3      |
| Totals                        |                  |        |           | 42          | 66     |

<sup>a</sup> Osprey in Mediterranean (Corsica, Italy, Balearics)

<sup>b</sup> Osprey Bierregaard North and South America

<sup>c</sup> LifeTrack Peregrine falcon

Supplementary Table 2

Table S2: Results of regional GAMMs built using forty years of global temperature data. These models were used for constructing energy seascapes (Fig. 2).

| East Asia                  |          |            |          |          |
|----------------------------|----------|------------|----------|----------|
| A. parametric coefficients | Estimate | Std. Error | t-value  | p-value  |
| (Intercept)                | -0.5051  | 0.0092     | -54.9250 | < 0.0001 |
| sun_elev_flow              | 2.1566   | 0.0114     | 189.5042 | < 0.0001 |
| sun_elev_fnight            | 2.3400   | 0.0103     | 227.6074 | < 0.0001 |
| B. smooth terms            | edf      | Ref.df     | F-value  | p-value  |
| s(lat,lon):sun_elev_fhigh  | 88.4643  | 88.4643    | 97.8487  | < 0.0001 |
| s(lat,lon):sun_elev_flow   | 91.2851  | 91.2851    | 196.2278 | < 0.0001 |
| s(lat,lon):sun_elev_fnight | 92.7295  | 92.7295    | 190.2838 | < 0.0001 |
| s(yday):sun_elev_fhigh     | 7.6664   | 8.0000     | 231.6346 | < 0.0001 |
| s(yday):sun_elev_flow      | 7.7456   | 8.0000     | 228.6311 | < 0.0001 |
| s(yday):sun_elev_fnight    | 7.7940   | 8.0000     | 471.8103 | < 0.0001 |
| s(year)                    | 0.0000   | 1.0000     | 0.0018   | < 0.0001 |

  

| The Americas               |          |            |          |          |
|----------------------------|----------|------------|----------|----------|
| A. parametric coefficients | Estimate | Std. Error | t-value  | p-value  |
| (Intercept)                | 0.0296   | 0.0108     | 2.7394   | 0.0062   |
| sun_elev_flow              | 1.3794   | 0.0129     | 106.6076 | < 0.0001 |
| sun_elev_fnight            | 1.6410   | 0.0126     | 130.5864 | < 0.0001 |
| B. smooth terms            | edf      | Ref.df     | F-value  | p-value  |
| s(lat,lon):sun_elev_fhigh  | 90.0437  | 90.0437    | 169.5629 | < 0.0001 |
| s(lat,lon):sun_elev_flow   | 94.5179  | 94.5179    | 141.5539 | < 0.0001 |
| s(lat,lon):sun_elev_fnight | 95.7668  | 95.7668    | 197.9859 | < 0.0001 |
| s(yday):sun_elev_fhigh     | 7.4179   | 8.0000     | 326.2731 | < 0.0001 |
| s(yday):sun_elev_flow      | 7.4498   | 8.0000     | 787.2890 | < 0.0001 |
| s(yday):sun_elev_fnight    | 7.2856   | 8.0000     | 524.7097 | < 0.0001 |
| s(year)                    | 0.0000   | 1.0000     | 0.0000   | 0.8275   |

Indian Ocean

| A. parametric coefficients | Estimate | Std. Error | t-value   | p-value  |
|----------------------------|----------|------------|-----------|----------|
| (Intercept)                | -0.1858  | 0.0051     | -36.2476  | < 0.0001 |
| sun_elev_flow              | 0.0578   | 0.0065     | 8.8270    | < 0.0001 |
| sun_elev_fnight            | 1.2402   | 0.0057     | 216.8062  | < 0.0001 |
| B. smooth terms            | edf      | Ref.df     | F-value   | p-value  |
| s(lat,lon):sun_elev_fhigh  | 94.7248  | 94.7248    | 231.4795  | < 0.0001 |
| s(lat,lon):sun_elev_flow   | 96.0323  | 96.0323    | 170.5800  | < 0.0001 |
| s(lat,lon):sun_elev_fnight | 95.7945  | 95.7945    | 151.6102  | < 0.0001 |
| s(yday):sun_elev_fhigh     | 7.9279   | 8.0000     | 1455.4752 | < 0.0001 |
| s(yday):sun_elev_flow      | 7.9261   | 8.0000     | 1537.6625 | < 0.0001 |
| s(yday):sun_elev_fnight    | 7.9736   | 8.0000     | 5190.4193 | < 0.0001 |
| s(year)                    | 0.0000   | 1.0000     | 0.0000    | 0.8801   |

Europe

| A. parametric coefficients | Estimate | Std. Error | t-value   | p-value  |
|----------------------------|----------|------------|-----------|----------|
| (Intercept)                | -1.3977  | 0.0943     | -14.8277  | < 0.0001 |
| sun_elev_flow              | 2.3936   | 0.0953     | 25.1193   | < 0.0001 |
| sun_elev_fnight            | 3.4697   | 0.0955     | 36.3168   | < 0.0001 |
| B. smooth terms            | edf      | Ref.df     | F-value   | p-value  |
| s(lat,lon):sun_elev_fhigh  | 2.0000   | 2.0000     | 56.3685   | < 0.0001 |
| s(lat,lon):sun_elev_flow   | 75.6502  | 75.6502    | 14.5510   | < 0.0001 |
| s(lat,lon):sun_elev_fnight | 82.6352  | 82.6352    | 40.0598   | < 0.0001 |
| s(yday):sun_elev_fhigh     | 6.0995   | 8.0000     | 210.8682  | < 0.0001 |
| s(yday):sun_elev_flow      | 7.8303   | 8.0000     | 1434.8943 | < 0.0001 |
| s(yday):sun_elev_fnight    | 7.6710   | 8.0000     | 1046.5831 | < 0.0001 |
| s(year)                    | 0.0000   | 1.0000     | 0.0000    | 0.0634   |



Mozambique Channel

| A. parametric coefficients | Estimate | Std. Error | t-value  | p-value  |
|----------------------------|----------|------------|----------|----------|
| (Intercept)                | 0.1469   | 0.0279     | 5.2605   | < 0.0001 |
| sun_elev_flow              | 0.2450   | 0.0334     | 7.3248   | < 0.0001 |
| sun_elev_fnight            | 1.7059   | 0.0280     | 61.0334  | < 0.0001 |
| B. smooth terms            | edf      | Ref.df     | F-value  | p-value  |
| s(lat,lon):sun_elev_fhigh  | 89.1660  | 89.1660    | 30.6120  | < 0.0001 |
| s(lat,lon):sun_elev_flow   | 71.4595  | 71.4595    | 165.7619 | < 0.0001 |
| s(lat,lon):sun_elev_fnight | 95.5807  | 95.5807    | 83.2314  | < 0.0001 |
| s(yday):sun_elev_fhigh     | 6.5492   | 8.0000     | 362.2948 | < 0.0001 |
| s(yday):sun_elev_flow      | 7.5523   | 8.0000     | 299.7936 | < 0.0001 |
| s(yday):sun_elev_fnight    | 7.5972   | 8.0000     | 608.8270 | < 0.0001 |
| s(year)                    | 0.0001   | 1.0000     | 0.0002   | 0.0780   |
